# Supplementary material for: The Andromonoecious Sex Determination Gene Predates the Separation of Cucumis and Citrullus Genera
Source: PubMed Central journal article supplement (PMC4865171; doi:10.1371/journal.pone.0155444), 2016-05-12
Supplement: pone.0155444.s002.pdf [file pone.0155444.s002.pdf]

| <b>Analysis</b>           | <b>Primer name</b> | <b>Sequence (5' to 3')</b>                            | <b>Fragment size (bp)</b> |
|---------------------------|--------------------|-------------------------------------------------------|---------------------------|
| Genotyping                | CIACS7_1165_F      | CGGCTATAAAAACGCCGAGCGAGTCC                            | 556                       |
|                           | CIACS7_STOP_R      | TTAATTAACCTTCATCTTCCTTCCTC                            |                           |
| qRT-PCR                   | CIACS7_F_423       | TGCAGCCAATGAGCTTCTTAC                                 | 108                       |
|                           | CIACS7_R_876       | CCCGTTCTCCATCTCAAATC                                  |                           |
|                           | CIActin2_F         | ATGTTGGGGATGAAGCTCAG                                  | 187                       |
|                           | CIActin2_R         | TTAGCCTTTGGGTTGAGTGG                                  |                           |
| <i>in situ</i> experiment | CIACS7_ATG_F       | ATGGCGATTGAGATTGAGATTGAGC                             | 1335                      |
|                           | CIACS7_STOP_R_T7   | TGTAATACGACTCACTATAGGGCTTA<br>ATTAACCTTCATCTTCCTTCCTC |                           |

Table S1 : List of the primers used.
